# Supplementary material for: Enhanced xylose fermentation and ethanol production by engineered Saccharomyces cerevisiae strain
Source: PubMed Central journal article supplement (PMC4385029; doi:10.1186/s13568-015-0102-y), 2015-02-26
Supplement: 13568_2015_102_MOESM1_ESM.pdf [file 13568_2015_102_MOESM1_ESM.pdf]

## Supplementary material

### Enhanced xylose fermentation and ethanol production by engineered *Saccharomyces cerevisiae* strain

Leonardo de Figueiredo Vilela<sup>1</sup>; Verônica Parente Gomes de Araujo<sup>1</sup>; Raquel de Sousa Paredes<sup>1</sup>; Elba Pinto da Silva Bon<sup>1</sup>; Fernando Araripe Torres<sup>2</sup>; Bianca Cruz Neves<sup>1</sup>; Elis Cristina Araújo Eleutherio<sup>1\*</sup>

<sup>1</sup>Department of Biochemistry, Institute of Chemistry, Federal University of Rio de Janeiro, Rio de Janeiro, Brazil

<sup>2</sup>Department of Cellular Biology, Institute of Biology, University of Brasília, Brasília, DF Brazil

\*Corresponding author

Address:

Av. Athos da Silveira Ramos 149, C.T., Bl. A, lab 547

CEP: 21941-909, Rio de Janeiro, RJ, Brazil

Phone/FAX: +55 21 2562-7735/7826

E-mail: eliscael@iq.ufrj.br

Table S1 - The target genes used in the gene expression studies

| <b>Gene</b> | <b>Protein</b>                     | <b>Function*</b>                                                                                                                |
|-------------|------------------------------------|---------------------------------------------------------------------------------------------------------------------------------|
| <i>XKS1</i> | Xylulokinase                       | Converts D-xylulose and ATP to xylulose 5-phosphate and ADP                                                                     |
| <i>RPE1</i> | D-ribulose-5-phosphate 3-epimerase | Converts D-ribulose 5-phosphate to D-xylulose 5-phosphate                                                                       |
| <i>RKI1</i> | Ribose-5-phosphate ketol-isomerase | Catalyzes the interconversion of ribose 5-phosphate and ribulose 5-phosphate                                                    |
| <i>TAL1</i> | Transaldolase                      | Converts sedoheptulose 7-phosphate and glyceraldehyde 3-phosphate to erythrose 4-phosphate and fructose 6-phosphate             |
| <i>TKL1</i> | Transketolase                      | Catalyzes conversion of xylulose-5-phosphate and ribose-5-phosphate to sedoheptulose-7-phosphate and glyceraldehyde-3-phosphate |
| <i>HXT1</i> | Hxt1p                              | Low-affinity glucose transporter                                                                                                |
| <i>HXT2</i> | Hxt2p                              | Intermediate/Low-affinity glucose transporter                                                                                   |
| <i>HXT7</i> | Hxt7p                              | High-affinity glucose transporter                                                                                               |

\*Ref: Cai et al. 2012
